# Supplementary material
Source: Research Square preprint supplement (doi:10.21203/rs.3.rs-9906733/v1)
Supplement: Supplementary file 1 [file e9125362a03a019478d3ff8b.docx]

# SUPPLEMENTARY INFORMATON

| **Supplemental Table 1** Bird “study skin” specimens used during the development of a new bone Pb measurement protocol. All specimens (*n* = 19) are housed at the University of Texas at Arlington and were selected so that the set includes various species, body sizes, and morphologies. | | | | |
| --- | --- | --- | --- | --- |
| **Species** | **Common Name** | **Collection Year** | **Collection**  **Location** | **Specimen Identifier** |
| *Antigone canadensis* | Sandhill crane | 1971 | Tarrant Co.,  Texas, U.S. | 348 |
| *Astur cooperii* | Cooper’s hawk | 1972 | Wheeler Co.,  Texas, U.S. | B-268 |
| *Campylorhynchus brunneicapillus* | Cactus wren | 1966 | unknown,  Veracruz, Mexico | B-160 |
| *Cardellina pusilla* | Wilson’s warbler | 1980 | Tarrant Co.,  Texas, U.S. | 1009 |
| *Cardinalis cardinalis* | Northern cardinal | 1976 | Grayson Co.,  Texas, U.S. | 701 |
| *Colaptes auratus* | Northern flicker | 1966 | Tarrant Co.,  Texas, U.S. | B-211 |
| *Columba livia* | Rock pigeon | 1975 | Dallas Co.,  Texas, U.S. | 3 |
| *Geococcyx californianus* | Greater roadrunner | 1966 | Tarrant Co.,  Texas, U.S. | B-198 |
| *Lanius ludovicianus* | Loggerhead shrike | 1975 | Tarrant Co.,  Texas, U.S. | 465 |
| *Larus argentatus* | Herring gull | 1963 | Cameron Co.,  Texas, U.S. | B-60 |
| *Mniotilta varia* | Black-and-white warbler | 1976 | McCurtain Co.,  Oklahoma, U.S. | 528 |
| *Passer domesticus* | House sparrow | 1973 | Tarrant Co.,  Texas, U.S. | B-304 |
| *Pelecanus occidentalis* | Brown pelican | unknown | unknown,  unknown, unknown | UTA10001 |
| *Poecile carolinensis* | Carolina chickadee | 1976 | Hill Co.,  Texas, U.S. | 536 |
| *Rynchops niger* | Black skimmer | unknown | Dallas Co.,  Texas, U.S. | 477 |
| *Strix varia* | Barred owl | 1975 | Tarrant Co.,  Texas, U.S. | 472 |
| *Sturnus vulgaris* | European starling | 1975 | Dallas Co.,  Texas, U.S. | 443 |
| *Tyrannus tyrannus* | Eastern kingbird | 1977 | Grarson Co.,  Texas, U.S. | 708 |
| *Tyto furcata* | American barn owl | 1975 | Calhoun Co.,  Texas, U.S. | 506 |

| **Supplemental Table 2**  Bone Pb concentrations measured by portable x-ray fluorescence (pXRF) at various locations throughout skeletons of preserved bird “study skin” specimens. Specimens (*n* = 19) represent distinct species and various morphologies, ecological traits, and Pb exposure histories. Specimens were collected between 1963-1980 from various localities within the US and Mexico, including from urbanized areas before milestone pollution regulations. The original Pb readings were obtained via 3-minute pXRF scans but were further corrected to account for the unique properties of the analyzer and the biological tissues being measured. |
| --- |

| **Species** | **Body location** | **Corrected**  **Bone Pb**  **(ug/g)** | **Corrected**  **Bone Pb Uncertainty**  **(2σ)** |
| --- | --- | --- | --- |
| Antigone canadensis | base of upper bill | 15.24 | 3.92 |
| Antigone canadensis | midpoint right tibiotarsus | 15.68 | 5.20 |
| Antigone canadensis | right knee | 22.78 | 6.57 |
| Antigone canadensis | left single phalange | 23.90 | 8.98 |
| Antigone canadensis | midpoint of upper bill | 24.88 | 6.35 |
| Antigone canadensis | right stacked phalanges | 25.13 | 8.14 |
| Antigone canadensis | left stacked phalanges | 26.80 | 10.83 |
| Antigone canadensis | proximal right tibiotarsus | 32.83 | 7.61 |
| Antigone canadensis | distal right tarsus | 33.83 | 14.16 |
| Antigone canadensis | base of lower bill | 37.13 | 7.36 |
| Antigone canadensis | distal left tarsus | 39.40 | 17.91 |
| Antigone canadensis | midpoint left tibiotarsus | 39.57 | 7.88 |
| Antigone canadensis | forehead | 39.79 | 7.49 |
| Antigone canadensis | proximal right tarsus | 40.27 | 8.36 |
| Antigone canadensis | distal-mid right tibiotarsus | 40.66 | 8.27 |
| Antigone canadensis | left knee | 41.11 | 10.24 |
| Antigone canadensis | crosspoint tarsus | 41.44 | 11.13 |
| Antigone canadensis | distal-mid left tibiotarsus | 41.50 | 10.26 |
| Antigone canadensis | proximal left tibiotarsus | 43.04 | 9.48 |
| Antigone canadensis | proximal-mid left tibiotarsus | 43.60 | 11.17 |
| Antigone canadensis | distal right tibiotarsus | 44.19 | 9.14 |
| Antigone canadensis | right intertarsal joint | 46.70 | 10.68 |
| Antigone canadensis | distal-mid right tarsus | 50.81 | 10.99 |
| Antigone canadensis | distal-mid left tarsus | 50.95 | 10.30 |
| Antigone canadensis | proximal-mid right tarsus | 52.27 | 7.61 |
| Antigone canadensis | midpoint of lower bill | 52.54 | 10.64 |
| Antigone canadensis | distal left tibiotarsus | 52.63 | 9.83 |
| Antigone canadensis | proximal-mid right tibiotarsus | 54.03 | 10.96 |
| Antigone canadensis | right single phalange | 61.11 | 13.36 |
| Antigone canadensis | left intertarsal joint | 64.02 | 9.94 |
| Antigone canadensis | proximal-mid left tarsus | 68.04 | 11.23 |
| Antigone canadensis | proximal left tarsus | 73.81 | 13.26 |
| Antigone canadensis | right "phalange joint" | 76.54 | 24.43 |
| Antigone canadensis | left "phalange joint" | 85.54 | 14.26 |
| Antigone canadensis | tip of upper and lower bill | 117.04 | 14.95 |
| Astur cooperii | distal left tarsus | 0.87 | 2.96 |
| Astur cooperii | distal-mid right tarsus | 1.72 | 9.46 |
| Astur cooperii | proximal-mid right tarsus | 2.00 | 3.41 |
| Astur cooperii | distal right tibiotarsus | 2.86 | 6.54 |
| Astur cooperii | crosspoint tarsus | 3.14 | 6.23 |
| Astur cooperii | forehead | 3.42 | 3.79 |
| Astur cooperii | distal right tarsus | 3.94 | 4.94 |
| Astur cooperii | distal left tibiotarsus | 4.58 | 5.17 |
| Astur cooperii | proximal left tarsus | 6.52 | 4.51 |
| Astur cooperii | right single phalange | 7.24 | 5.08 |
| Astur cooperii | upper and lower bill | 7.27 | 6.29 |
| Astur cooperii | proximal right tarsus | 8.86 | 6.59 |
| Astur cooperii | left intertarsal joint | 9.22 | 9.04 |
| **Supplementary Table 2 continued** |  |  |  |
| **Species** | **Body location** | **Corrected Bone Pb** | **Uncertainty** |
| Astur cooperii | left "phalange joint" | 9.69 | 18.26 |
| Astur cooperii | right intertarsal joint | 13.14 | 14.37 |
| Astur cooperii | left stacked phalanges | 18.40 | 6.27 |
| Astur cooperii | right stacked phalanges | 19.09 | 16.98 |
| Astur cooperii | right "phalange joint" | 21.11 | 21.81 |
| Campylorhynchus brunneicapillus | tip of upper and lower bill | 2.10 | 2.73 |
| Campylorhynchus brunneicapillus | midpoint of upper and lower bill | 3.93 | 2.90 |
| Campylorhynchus brunneicapillus | right stacked phalanges | 4.73 | 3.43 |
| Campylorhynchus brunneicapillus | right "phalange joint" | 5.28 | 2.04 |
| Campylorhynchus brunneicapillus | forehead | 6.27 | 5.91 |
| Campylorhynchus brunneicapillus | left intertarsal joint | 10.83 | 3.35 |
| Campylorhynchus brunneicapillus | left stacked phalanges | 11.10 | 4.69 |
| Campylorhynchus brunneicapillus | proximal left tarsus | 13.49 | 4.68 |
| Campylorhynchus brunneicapillus | right intertarsal joint | 15.30 | 4.98 |
| Campylorhynchus brunneicapillus | proximal right tarsus | 15.96 | 3.88 |
| Campylorhynchus brunneicapillus | left "phalange joint" | 16.09 | 8.19 |
| Campylorhynchus brunneicapillus | base of upper and lower bill | 20.52 | 6.07 |
| Campylorhynchus brunneicapillus | midpoint right tarsus | 22.25 | 4.01 |
| Campylorhynchus brunneicapillus | crosspoint tarsus | 33.64 | 7.87 |
| Campylorhynchus brunneicapillus | midpoint left tarsus | 39.97 | 4.32 |
| Cardellina pusilla | proximal half of right tarsus | 3.12 | 2.27 |
| Cardellina pusilla | upper and lower bill | 3.70 | 2.67 |
| Cardellina pusilla | proximal half of left tarsus | 3.78 | 2.46 |
| Cardellina pusilla | left "phalange joint" | 3.79 | 2.25 |
| Cardellina pusilla | distal half of right tarsus | 3.79 | 2.33 |
| Cardellina pusilla | left stacked phalanges | 4.01 | 1.81 |
| Cardellina pusilla | distal half of left tarsus | 4.94 | 3.06 |
| Cardellina pusilla | right intertarsal joint | 4.96 | 1.64 |
| Cardellina pusilla | crosspoint tarsus | 5.92 | 3.11 |
| Cardellina pusilla | left intertarsal joint | 6.41 | 4.46 |
| Cardellina pusilla | right "phalange joint" | 10.95 | 3.39 |
| Cardellina pusilla | right stacked phalanges | 12.09 | 4.33 |
| Cardellina pusilla | forehead | 24.60 | 13.04 |
| Cardinalis cardinalis | upper bill | 14.25 | 2.71 |
| Cardinalis cardinalis | right intertarsal joint | 39.97 | 4.98 |
| Cardinalis cardinalis | distal half of right tarsus | 45.18 | 4.07 |
| Cardinalis cardinalis | left "phalange joint" | 48.88 | 5.14 |
| Cardinalis cardinalis | proximal half of right tarsus | 54.93 | 5.43 |
| Cardinalis cardinalis | crosspoint tarsus | 56.52 | 6.82 |
| Cardinalis cardinalis | right stacked phalanges | 57.85 | 4.73 |
| Cardinalis cardinalis | right "phalange joint" | 68.81 | 6.94 |
| Cardinalis cardinalis | lower bill | 73.99 | 8.86 |
| Cardinalis cardinalis | left stacked phalanges | 101.74 | 9.06 |
| Cardinalis cardinalis | proximal half of left tarsus | 111.46 | 9.30 |
| Cardinalis cardinalis | distal half of left tarsus | 122.94 | 8.42 |
| Cardinalis cardinalis | left intertarsal joint | 162.23 | 10.77 |
| Cardinalis cardinalis | forehead | 222.99 | 11.80 |
| Colaptes auratus | right stacked phalanges | 6.18 | 1.77 |
| Colaptes auratus | midpoint of upper and lower bill | 6.67 | 3.63 |
| Colaptes auratus | tip of upper and lower bill | 7.71 | 4.36 |
| Colaptes auratus | right intertarsal joint | 8.70 | 4.28 |
| Colaptes auratus | right "phalange joint" | 10.11 | 2.59 |
| Colaptes auratus | proximal half of right tarsus | 10.86 | 3.78 |
| Colaptes auratus | crosspoint tarsus | 11.34 | 4.02 |
| Colaptes auratus | proximal half of left tarsus | 15.44 | 4.56 |
| Colaptes auratus | forehead | 16.39 | 6.57 |
| Colaptes auratus | distal left tibiotarsus | 18.81 | 4.51 |
| Colaptes auratus | left stacked phalanges | 21.51 | 5.28 |
| Colaptes auratus | base of upper and lower bill | 24.65 | 7.29 |
| Colaptes auratus | left intertarsal joint | 25.71 | 5.01 |
| **Supplementary Table 2 continued** |  |  |  |
| **Species** | **Body location** | **Corrected Bone Pb** | **Uncertainty** |
| Colaptes auratus | left "phalange joint" | 41.86 | 9.44 |
| Columba livia | distal half of left tarsus | 3.58 | 2.38 |
| Columba livia | proximal half of right tarsus | 9.32 | 6.96 |
| Columba livia | crosspoint tarsus | 9.39 | 5.40 |
| Columba livia | right "phalange joint" | 9.71 | 5.60 |
| Columba livia | left "phalange joint" | 11.45 | 5.44 |
| Columba livia | distal half of right tarsus | 13.73 | 9.86 |
| Columba livia | right stacked phalanges | 17.84 | 8.52 |
| Columba livia | left stacked phalanges | 19.02 | 5.30 |
| Columba livia | distal right tibiotarsus | 22.70 | 7.44 |
| Columba livia | right intertarsal joint | 28.56 | 9.21 |
| Columba livia | proximal half of left tarsus | 42.00 | 13.24 |
| Columba livia | left intertarsal joint | 49.83 | 13.28 |
| Columba livia | forehead | 60.42 | 7.57 |
| Columba livia | distal left tibiotarsus | 61.15 | 18.27 |
| Columba livia | upper and lower bill | 63.69 | 14.96 |
| Geococcyx californianus | crosspoint tarsus | 3.31 | 2.86 |
| Geococcyx californianus | midpoint right tarsus | 6.00 | 3.84 |
| Geococcyx californianus | proximal right tarsus | 9.73 | 5.94 |
| Geococcyx californianus | distal right tarsus | 10.10 | 5.88 |
| Geococcyx californianus | midpoint of upper and lower bill | 10.58 | 5.82 |
| Geococcyx californianus | midpoint left tarsus | 10.84 | 4.36 |
| Geococcyx californianus | distal right tibiotarsus | 12.89 | 5.73 |
| Geococcyx californianus | midpoint right tibiotarsus | 14.27 | 3.63 |
| Geococcyx californianus | distal left tarsus | 14.37 | 6.48 |
| Geococcyx californianus | proximal left tibiotarsus | 16.27 | 10.82 |
| Geococcyx californianus | proximal left tarsus | 17.01 | 7.66 |
| Geococcyx californianus | distal left tibiotarsus | 18.71 | 8.73 |
| Geococcyx californianus | right "phalange joint" | 20.21 | 8.83 |
| Geococcyx californianus | base of upper and lower bill | 21.30 | 6.07 |
| Geococcyx californianus | midpoint left tibiotarsus | 21.37 | 7.13 |
| Geococcyx californianus | right intertarsal joint | 22.08 | 7.78 |
| Geococcyx californianus | forehead | 23.63 | 9.28 |
| Geococcyx californianus | left intertarsal joint | 28.18 | 9.27 |
| Geococcyx californianus | proximal right tibiotarsus | 28.61 | 16.23 |
| Geococcyx californianus | left stacked phalanges | 31.37 | 4.29 |
| Geococcyx californianus | left "phalange joint" | 50.29 | 10.89 |
| Geococcyx californianus | tip of upper and lower bill | 53.96 | 11.01 |
| Geococcyx californianus | right stacked phalanges | 70.46 | 7.87 |
| Lanius ludovicianus | proximal half of left tarsus | 65.35 | 6.99 |
| Lanius ludovicianus | upper and lower bill | 72.10 | 10.05 |
| Lanius ludovicianus | proximal half of right tarsus | 78.53 | 5.55 |
| Lanius ludovicianus | distal half of right tarsus | 91.18 | 7.36 |
| Lanius ludovicianus | forehead | 112.71 | 10.63 |
| Lanius ludovicianus | left stacked phalanges | 123.48 | 8.10 |
| Lanius ludovicianus | crosspoint tarsus | 136.95 | 13.51 |
| Lanius ludovicianus | distal right tibiotarsus | 144.64 | 9.17 |
| Lanius ludovicianus | left "phalange joint" | 155.27 | 8.42 |
| Lanius ludovicianus | right intertarsal joint | 159.88 | 11.02 |
| Lanius ludovicianus | right "phalange joint" | 172.43 | 10.91 |
| Lanius ludovicianus | distal left tibiotarsus | 213.03 | 17.43 |
| Lanius ludovicianus | left intertarsal joint | 217.84 | 18.69 |
| Lanius ludovicianus | right stacked phalanges | 247.66 | 17.66 |
| Larus argentatus | midpoint right tibiotarsus | 14.40 | 6.15 |
| Larus argentatus | distal right tibiotarsus | 24.10 | 8.12 |
| Larus argentatus | distal left tibiotarsus | 25.42 | 6.61 |
| Larus argentatus | midpoint left tibiotarsus | 27.03 | 10.26 |
| Larus argentatus | distal left tarsus | 29.89 | 10.64 |
| Larus argentatus | crosspoint tarsus | 29.91 | 6.74 |
| Larus argentatus | proximal right tarsus | 32.05 | 7.74 |
| **Supplementary Table 2 continued** |  |  |  |
| **Species** | **Body location** | **Corrected Bone Pb** | **Uncertainty** |
| Larus argentatus | proximal left tarsus | 40.16 | 7.32 |
| Larus argentatus | forehead | 43.21 | 6.86 |
| Larus argentatus | midpoint left tarsus | 47.73 | 10.00 |
| Larus argentatus | right stacked phalanges | 50.19 | 10.74 |
| Larus argentatus | distal right tarsus | 54.11 | 10.53 |
| Larus argentatus | left stacked phalanges | 62.21 | 15.17 |
| Larus argentatus | right "phalange joint" | 63.49 | 10.23 |
| Larus argentatus | left "phalange joint" | 63.52 | 17.78 |
| Larus argentatus | midpoint of upper and lower bill | 66.08 | 9.48 |
| Larus argentatus | base of upper and lower bill | 70.52 | 12.09 |
| Larus argentatus | tip of upper and lower bill | 72.62 | 9.44 |
| Larus argentatus | left intertarsal joint | 88.49 | 10.30 |
| Larus argentatus | right intertarsal joint | 113.12 | 17.84 |
| Mniotilta varia | distal half of right tarsus | 2.84 | 1.52 |
| Mniotilta varia | upper and lower bill | 5.24 | 2.35 |
| Mniotilta varia | feet together | 9.98 | 3.71 |
| Mniotilta varia | proximal half of right tarsus | 10.74 | 3.54 |
| Mniotilta varia | right intertarsal joint | 10.91 | 2.78 |
| Mniotilta varia | crosspoint tarsus | 11.08 | 3.79 |
| Mniotilta varia | left intertarsal joint | 14.44 | 3.66 |
| Mniotilta varia | proximal half of left tarsus | 14.86 | 3.78 |
| Mniotilta varia | forehead | 17.37 | 7.64 |
| Passer domesticus | right intertarsal joint | 39.90 | 4.60 |
| Passer domesticus | proximal half of right tarsus | 49.54 | 6.55 |
| Passer domesticus | right "phalange joint" | 52.65 | 5.74 |
| Passer domesticus | left "phalange joint" | 53.96 | 4.82 |
| Passer domesticus | upper and lower bill | 55.20 | 7.45 |
| Passer domesticus | distal half of left tarsus | 56.09 | 4.17 |
| Passer domesticus | crosspoint tarsus | 60.45 | 6.46 |
| Passer domesticus | right stacked phalanges | 82.84 | 7.74 |
| Passer domesticus | left stacked phalanges | 83.46 | 6.97 |
| Passer domesticus | left intertarsal joint | 95.13 | 6.49 |
| Passer domesticus | forehead | 186.92 | 14.45 |
| Pelecanus occidentalis | proximal left tarsus | 0.41 | 6.28 |
| Pelecanus occidentalis | midpoint right tarsus | 0.58 | 1.93 |
| Pelecanus occidentalis | distal-mid right tarsus | 0.96 | 2.17 |
| Pelecanus occidentalis | base of upper bill | 1.11 | 1.99 |
| Pelecanus occidentalis | forehead | 1.40 | 2.37 |
| Pelecanus occidentalis | base of lower bill | 1.45 | 3.40 |
| Pelecanus occidentalis | midpoint of lower bill | 1.56 | 3.67 |
| Pelecanus occidentalis | proximal-mid right tarsus | 2.21 | 8.56 |
| Pelecanus occidentalis | midpoint left tarsus | 2.22 | 6.93 |
| Pelecanus occidentalis | crosspoint tarsus | 3.29 | 8.34 |
| Pelecanus occidentalis | midpoint of upper bill | 3.39 | 8.37 |
| Pelecanus occidentalis | tip of upper bill | 3.58 | 11.10 |
| Pelecanus occidentalis | right intertarsal joint | 3.74 | 6.24 |
| Pelecanus occidentalis | proximal right tarsus | 4.17 | 6.37 |
| Pelecanus occidentalis | right stacked phalanges | 4.50 | 9.69 |
| Pelecanus occidentalis | tip of lower bill | 4.60 | 6.52 |
| Pelecanus occidentalis | distal right tibiotarsus | 5.21 | 6.65 |
| Pelecanus occidentalis | distal right tarsus | 5.96 | 7.64 |
| Pelecanus occidentalis | right "phalange joint" | 7.01 | 12.36 |
| Pelecanus occidentalis | left stacked phalanges | 10.07 | 9.99 |
| Pelecanus occidentalis | left intertarsal joint | 11.56 | 15.42 |
| Pelecanus occidentalis | left single phalange | 13.27 | 7.68 |
| Pelecanus occidentalis | distal left tibiotarsus | 17.45 | 14.94 |
| Pelecanus occidentalis | left "phalange joint" | 19.89 | 17.89 |
| Poecile carolinensis | upper and lower bill | 8.77 | 3.17 |
| Poecile carolinensis | forehead | 16.95 | 8.39 |
| Poecile carolinensis | crosspoint tarsus | 27.95 | 5.22 |
| **Supplementary Table 2 continued** |  |  |  |
| **Species** | **Body location** | **Corrected Bone Pb** | **Uncertainty** |
| Poecile carolinensis | feet together | 83.00 | 7.51 |
| Rynchops niger | base of upper bill | 0.46 | 1.20 |
| Rynchops niger | base of lower bill | 2.87 | 4.01 |
| Rynchops niger | distal left tibiotarsus | 3.03 | 6.05 |
| Rynchops niger | distal right tibiotarsus | 3.08 | 2.60 |
| Rynchops niger | midpoint right tibiotarsus | 3.56 | 2.87 |
| Rynchops niger | forehead | 3.67 | 2.86 |
| Rynchops niger | midpoint left tibiotarsus | 3.77 | 4.09 |
| Rynchops niger | proximal left tibiotarsus | 4.05 | 3.82 |
| Rynchops niger | midpoint of lower bill | 4.10 | 3.96 |
| Rynchops niger | proximal half of left tarsus | 4.22 | 4.09 |
| Rynchops niger | distal half of left tarsus | 4.73 | 3.78 |
| Rynchops niger | distal half of right tarsus | 5.17 | 4.52 |
| Rynchops niger | right stacked phalanges | 5.20 | 4.67 |
| Rynchops niger | crosspoint tarsus | 5.90 | 4.54 |
| Rynchops niger | tip of upper and lower bill | 6.09 | 4.46 |
| Rynchops niger | midpoint of upper bill | 6.62 | 5.75 |
| Rynchops niger | right "phalange joint" | 6.65 | 5.29 |
| Rynchops niger | proximal half of right tarsus | 6.71 | 5.81 |
| Rynchops niger | left intertarsal joint | 7.99 | 5.15 |
| Rynchops niger | proximal right tibiotarsus | 8.81 | 4.08 |
| Rynchops niger | left stacked phalanges | 10.17 | 6.91 |
| Rynchops niger | right intertarsal joint | 11.18 | 7.66 |
| Rynchops niger | left "phalange joint" | 14.78 | 12.19 |
| Strix varia | proximal-mid left tarsus | 4.94 | 4.21 |
| Strix varia | proximal left tibiotarsus | 6.51 | 5.21 |
| Strix varia | proximal-mid right tibiotarsus | 8.58 | 4.47 |
| Strix varia | right stacked phalanges | 8.63 | 5.82 |
| Strix varia | distal right tarsus | 8.83 | 5.13 |
| Strix varia | proximal-mid left tibiotarsus | 8.88 | 5.64 |
| Strix varia | proximal right tibiotarsus | 9.11 | 8.42 |
| Strix varia | proximal left tarsus | 9.19 | 7.79 |
| Strix varia | distal left tibiotarsus | 9.96 | 6.98 |
| Strix varia | distal right tibiotarsus | 9.99 | 2.49 |
| Strix varia | distal left tarsus | 10.21 | 6.74 |
| Strix varia | forehead | 10.27 | 3.86 |
| Strix varia | proximal right tarsus | 11.14 | 4.86 |
| Strix varia | midpoint left tibiotarsus | 11.54 | 6.06 |
| Strix varia | midpoint right tibiotarsus | 12.14 | 4.44 |
| Strix varia | left intertarsal joint | 13.89 | 7.46 |
| Strix varia | distal-mid right tibiotarsus | 15.68 | 4.27 |
| Strix varia | crosspoint tarsus | 17.15 | 2.50 |
| Strix varia | distal-mid left tibiotarsus | 19.92 | 9.30 |
| Strix varia | upper and lower bill | 23.24 | 7.01 |
| Strix varia | right "phalange joint" | 24.15 | 11.17 |
| Strix varia | left "phalange joint" | 25.93 | 22.21 |
| Strix varia | right intertarsal joint | 31.29 | 12.43 |
| Strix varia | left stacked phalanges | 58.09 | 16.63 |
| Sturnus vulgaris | tip of upper and lower bill | 19.03 | 4.64 |
| Sturnus vulgaris | midpoint of upper and lower bill | 29.41 | 5.38 |
| Sturnus vulgaris | proximal half of left tarsus | 39.94 | 5.58 |
| Sturnus vulgaris | proximal half of right tarsus | 42.77 | 4.81 |
| Sturnus vulgaris | left stacked phalanges | 60.10 | 6.53 |
| Sturnus vulgaris | base of upper and lower bill | 62.17 | 5.55 |
| Sturnus vulgaris | right stacked phalanges | 62.59 | 20.98 |
| Sturnus vulgaris | left "phalange joint" | 68.59 | 8.65 |
| Sturnus vulgaris | crosspoint tarsus | 83.48 | 8.58 |
| Sturnus vulgaris | right "phalange joint" | 91.88 | 9.98 |
| Sturnus vulgaris | right intertarsal joint | 98.10 | 7.18 |
| Sturnus vulgaris | forehead | 102.06 | 11.25 |
| **Supplementary Table 2 continued** |  |  |  |
| **Species** | **Body location** | **Corrected Bone Pb** | **Uncertainty** |
| Sturnus vulgaris | distal right tibiotarsus | 109.79 | 7.40 |
| Sturnus vulgaris | distal left tibiotarsus | 120.65 | 7.62 |
| Sturnus vulgaris | left intertarsal joint | 146.42 | 8.39 |
| Tyrannus tyrannus | tip of upper and lower bill | 1.59 | 1.65 |
| Tyrannus tyrannus | midpoint of upper and lower bill | 2.76 | 2.41 |
| Tyrannus tyrannus | distal half of right tarsus | 11.44 | 3.44 |
| Tyrannus tyrannus | base of upper and lower bill | 16.07 | 5.14 |
| Tyrannus tyrannus | proximal half of right tarsus | 16.31 | 4.56 |
| Tyrannus tyrannus | proximal half of left tarsus | 18.61 | 4.26 |
| Tyrannus tyrannus | right intertarsal joint | 20.20 | 4.23 |
| Tyrannus tyrannus | crosspoint tarsus | 23.44 | 7.02 |
| Tyrannus tyrannus | left "phalange joint" | 23.99 | 4.66 |
| Tyrannus tyrannus | distal half of left tarsus | 25.05 | 4.36 |
| Tyrannus tyrannus | left intertarsal joint | 30.38 | 4.65 |
| Tyrannus tyrannus | left stacked phalanges | 33.59 | 5.86 |
| Tyrannus tyrannus | right stacked phalanges | 51.60 | 8.65 |
| Tyrannus tyrannus | right "phalange joint" | 53.03 | 8.99 |
| Tyrannus tyrannus | forehead | 58.45 | 10.43 |
| Tyto furcata | distal left tibiotarsus | 0.93 | 2.64 |
| Tyto furcata | distal left tarsus | 2.45 | 4.57 |
| Tyto furcata | right "phalange joint" | 8.08 | 7.41 |
| Tyto furcata | distal right tibiotarsus | 8.39 | 9.63 |
| Tyto furcata | proximal right tarsus | 8.72 | 7.33 |
| Tyto furcata | distal right tarsus | 9.98 | 6.63 |
| Tyto furcata | base of upper and lower bill | 10.02 | 9.90 |
| Tyto furcata | midpoint left tarsus | 11.08 | 7.41 |
| Tyto furcata | left intertarsal joint | 11.46 | 12.18 |
| Tyto furcata | left single phalange | 13.82 | 4.41 |
| Tyto furcata | left stacked phalanges | 14.56 | 8.53 |
| Tyto furcata | right single phalange | 15.49 | 8.81 |
| Tyto furcata | right stacked phalanges | 15.97 | 8.82 |
| Tyto furcata | crosspoint tarsus | 16.19 | 10.55 |
| Tyto furcata | tip of upper and lower bill | 18.46 | 13.41 |
| Tyto furcata | right intertarsal joint | 20.78 | 11.11 |
| Tyto furcata | forehead | 22.67 | 5.12 |
| Tyto furcata | left "phalange joint" | 26.43 | 18.46 |
| Tyto furcata | proximal left tarsus | 31.92 | 21.86 |
